# Mobilisation of Ca<sup>2+</sup> stores and flagellar regulation in human sperm by S-nitrosylation: a role for NO synthesised in the female reproductive tract

Gisela Machado-Oliveira<sup>1,2</sup>, Linda Lefièvre<sup>2,3</sup>, Christopher Ford<sup>2,3</sup>, M. Belen Herrero<sup>4</sup>, Christopher Barratt<sup>5</sup>, Thomas J. Connolly<sup>2,3</sup>, Katherine Nash<sup>1,2</sup>, Aduen Morales-Garcia<sup>1,2</sup>, Jackson Kirkman-Brown<sup>2,3</sup> and Steve Publicover<sup>1,2,\*</sup>

Generation of NO by nitric oxide synthase (NOS) is implicated in gamete interaction and fertilisation. Exposure of human spermatozoa to NO donors caused mobilisation of stored Ca<sup>2+</sup> by a mechanism that did not require activation of guanylate cyclase but was mimicked by S-nitroso-glutathione (GSNO; an S-nitrosylating agent). Application of dithiothreitol, to reduce protein-SNO groups, rapidly reversed the actions of NO and GSNO on [Ca<sup>2+</sup>]<sub>i</sub>. The effects of NO, GSNO and dithiothreitol on sperm protein S-nitrosylation, assessed using the biotin switch method, closely paralleled their actions on [Ca<sup>2+</sup>]<sub>i</sub>. Immunofluorescent staining revealed constitutive and inducible NOS in human oviduct and cumulus (the cellular layer investing the oocyte). 4,5-diaminofluorescein (DAF) staining demonstrated production of NO by these tissues. Incubation of human sperm with oviduct explants induced sperm protein S-nitrosylation resembling that induced by NO donors and GSNO. Progesterone (a product of cumulus cells) also mobilises stored Ca<sup>2+</sup> in human sperm. Pre-treatment of sperm with NO greatly enhanced the effect of progesterone on [Ca<sup>2+</sup>]<sub>i</sub>, resulting in a prolonged increase in flagellar excursion. We conclude that NO regulates mobilisation of stored Ca<sup>2+</sup> in human sperm by protein S-nitrosylation, that this action is synergistic with that of progesterone and that this synergism is potentially highly significant in gamete interactions leading to fertilisation.

**KEY WORDS:** Calcium, Cumulus, Motility, Nitric oxide, Oviduct, Sperm, Human

## INTRODUCTION

Nitric oxide (NO), which is synthesised by nitric oxide synthases (endothelial, neuronal and inducible types; eNOS, nNOS and iNOS) acts as a rapid paracrine (and probably autocrine) cellular messenger, typically by activation of soluble guanylate cyclase (sGC) (Arnold et al., 1977; Miki et al., 1977; Braughler et al., 1979; Ahern et al., 2002). It is a small, uncharged molecule and therefore highly diffusible. However, NO is a free radical and its reactivity is such that the lifetime of the molecule is brief, with biological effects probably being confined to a volume with a radius of 100-200 µm from the point of synthesis (Lancaster, 1997). Though the action of NO is of particular importance in the cardiovascular tissue [where it was first called endothelium-derived relaxing factor (EDRF)] and nervous system (Calebrese et al., 2007; Li and Moore, 2007; Rastaldo et al., 2007), it is now clear that NO plays a role in most tissue and cell types. The expression of NOS has been demonstrated both in cells of the male and female mammalian reproductive tracts and also in gametes of vertebrates and invertebrates, leading to the suggestion that NO may play important physiological roles in fertilisation (Creech et al., 1998; Rosselli et al., 1998; Thaler and Epel, 2003; Kim et al., 2004).

In mammalian sperm, production of NO endogenously and/or by cells of the female reproductive tract may contribute to capacitation, inducing tyrosine phosphorylation by mechanisms involving and/or independent of the cAMP-protein kinase A pathway (Funahashi, 2002; Thundathil et al., 2003; O'Flaherty et al., 2004; O'Flaherty et al., 2005; O'Flaherty et al., 2006; Roy and Atreya, 2008). NO also induces or contributes to induction of acrosome reaction (Revelli et al., 2001; Funahashi, 2002; Herrero et al., 2003; O'Flaherty et al., 2004; Yang et al., 2005). With regard to effects of NO on motility of mammalian sperm, a number of studies have shown that application of NO in vitro has functional effects, but the data here are complex. Treatment with NO donors at high doses, or prolonged exposure to NO, suppresses motility, probably simulating cytotoxic effects that may occur in the testis or in sperm held in semen (Herrero et al., 1994; Weinberg et al., 1995; Zhang and Zheng, 1996; Joo et al., 1999; Calabrese, 2001; Wu et al., 2004). However, low concentrations of NO may stimulate motility (Herrero et al., 1994; Zhang and Zheng, 1996; Calabrese, 2001). In this context, the study of Creech et al. (Creech et al., 1998) on sperm of the Fathead Minnow (*Pimephelus promelus*) is particularly interesting. In ova of this fish, NOS is localised to the micropyle, the route of entry into the oocyte for the sperm. NO is produced during a crucial 5 minute period after laying of the eggs and enhances sperm motility. The spatial and temporal 'precision' of the NO signal thus potentially plays a key role in fertilisation in this species (Creech et al., 1998). Reports that NOS is present in the mammalian oviduct (Rosselli et al., 1996; Ekerhovd et al., 1999; Lapointe et al., 2006), and also in the oocyte and the cumulus and corona cells that surround it (Hattori et al., 2001; Reyes et al., 2004; Tao et al., 2004), raise the intriguing possibility that NO plays a similar role in mammalian fertilisation, regulating sperm motility or even inducing chemotaxis (Miraglia et al., 2007).

<sup>1</sup>School of Biosciences, University of Birmingham, Birmingham B15 2TT, UK. <sup>2</sup>Centre for Human Reproductive Science, Birmingham Women's Hospital, Birmingham B15 2TG, UK. <sup>3</sup>Reproductive Biology and Genetics Research Group, The Medical School, University of Birmingham, Birmingham B15 2TT, UK. <sup>4</sup>Center for Research in Contraceptive and Reproductive Health, Department of Cell Biology, PO Box 800732, University of Virginia, Charlottesville, VA 22908, USA. <sup>5</sup>Division of Maternal and Child Health Sciences, Medical School, University of Dundee, Ninewells Hospital, Dundee DD1 9SY, UK.

\* Author for correspondence (e-mail: s.j.publicover@bham.ac.uk)

Participation of  $\text{Ca}^{2+}$ , a key regulator of sperm motility and hyperactivation (Darszon et al., 2007; Publicover et al., 2007), in modulation by NO has not yet been investigated. Here, we report that NO is a potent regulator of  $\text{Ca}^{2+}$  signalling in human sperm, acting synergistically with progesterone, and we propose a role for NO in regulating the interaction of human gametes.

## MATERIALS AND METHODS

### Female reproductive tract and cumulus cells

Oviduct and endometrial explants were obtained with informed consent from pre-menopausal individuals undergoing hysterectomy or bilateral salpingectomy (for reasons unconnected with tubal pathology) at the Birmingham Women's Hospital (Shropshire REC Reference: 06/Q2601/51).

Surplus cumulus cells were obtained during intracytoplasmic sperm injection (ICSI) cycles performed at The Assisted Conception Unit, Birmingham Women's Hospital [Human Fertilization and Embryology Authority (HFEA) Centre 0199].

COV434 cells (immortalised human granulosa cell line; a gift from the Clinical Oncology Unit, LUMC, The Netherlands) (Zhang et al., 2000) were grown in DMEM-F12 (10% foetal bovine serum; 1% penicillin/streptomycin; 1% non essential amino acids) at 37°C, 5%  $\text{CO}_2$ .

### Detection of NOS in human female reproductive tract and cumulus

Loose human cumulus from oocyte retrieval were stored in phosphate-buffered saline (PBS) at 4°C. Cells were then smeared onto standard microscope slides, air-dried and fixed with 100% methanol (−20°C for 6 minutes). The slides were treated with 50% (v/v) methanol in PBS (20°C for 5 minutes) and washed three times in 0.1% (v/v) Triton X-100 in PBS and subsequently re-hydrated with PBS for 15 minutes (20°C).

COV434 cells were released by scraping and centrifuged at 300 g for 5 minutes at room temperature. Cells were then resuspended in PBS, smeared onto standard microscope slides, air-dried and fixed with 4% formaldehyde for 6 minutes at room temperature then permeabilised using 0.2% Triton X-100 for 15 minutes and washed with 0.1% (v/v) Triton X-100 in PBS.

Ampullary explants were washed in Hanks balanced salt solution (HBSS, Gibco) before being incubated with 0.25% collagenase type I (Gibco: 17100-017) in Dulbecco's phosphate-buffered saline (DPBS) w/o  $\text{CaCl}_2$  or  $\text{MgCl}_2$  (Gibco 14190) for 1 hour at 37°C with gentle agitation. The supernatant was collected and pelleted by centrifugation at 500 g for 5 minutes. This was then plated in DMEM F12 supplemented with 150 pg/ml  $17\beta$ -oestradiol and left to adhere and grow at 37°C in 6%  $\text{CO}_2$  for 2 days. These cells formed a monolayer and retained functioning cilia. Fixation/permeabilisation was as for COV434 cells.

Slides were blocked in 1% (w/v) bovine serum albumin (BSA), 5% (v/v) goat serum in PBS (30 minutes, 37°C in 5%  $\text{CO}_2$  in air) then incubated with rabbit polyclonal anti-eNOS, -nNOS or -iNOS (1:50 dilution in 1% (w/v) BSA in PBS, 37°C in 5%  $\text{CO}_2$  in air, 60 minutes). Slides were washed with PBS then secondary antibody [donkey anti-rabbit Texas Red or FITC, 1:200 dilution in 1% (w/v) BSA in PBS] was applied (37°C in 5%  $\text{CO}_2$  in air for 60 minutes). Finally, slides were washed and coverslips mounted using DakoCytomation fluorescence mounting medium.

### Detection of NO production in cumulus and oviductal epithelium

Human cumulus masses and ampullary explants were washed in supplemented Earle's Balanced Salt Solution (sEBSS) and incubated in the dark at 37°C and 6%  $\text{CO}_2$  with 5  $\mu\text{M}$  4,5-diaminofluorescein (DAF)-FM diacetate for 30 minutes. Excess DAF-FM was removed by three washes in sEBSS and the cumulus was transferred to microscope slides under a cover slip supported on spots of vacuum grease so as to compress it gently. The slides were examined under a Nikon inverted fluorescence microscope (488 nm excitation/540 nm emission).

### Sperm preparation and capacitation

Donors were recruited at the Birmingham Women's Hospital (HFEA Centre 0119), in accordance with the Human and Embryology Authority Code of Practice. All donors gave informed consent (LREC 2003/239) and sperm were obtained by direct swim-up into sEBSS (pH 7.3-7.4) with 0.3% BSA

and adjusted to 6 million cells/ml (Kirkman-Brown et al., 2000). Sperm were allowed to capacitate at 37°C and 5%  $\text{CO}_2$  for 5-6 hours. For the biotin switch assay, semen was layered over 1 ml fractions of 45 and 90% Percoll [made isotonic with M medium 1×: 137 mM NaCl, 2.5 mM KCl, 20 mM 4-(2-hydroxyethyl)-1-piperazineethanesulfonic acid (HEPES), 10 mM glucose]. Samples were centrifuged (2000 g for 20 minutes), further washed with PBS, then diluted and incubated in PBS.

### Single cell imaging

Cell density was reduced to 4 million cells/ml and 200  $\mu\text{l}$  aliquots were then loaded with 12  $\mu\text{M}$  Oregon Green BAPTA (OGB) 1-AM (0.6% dimethyl sulfoxide (DMSO), 0.12% Pluronic F-127) for 40 minutes and transferred to an imaging chamber (180  $\mu\text{l}$ ), incorporating a coverslip coated with 1% poly-D-lysine (PDL), for further 20 minutes (all at 37°C and 5%  $\text{CO}_2$ ). The imaging chamber was then perfused with fresh medium (25°C) to remove unattached cells and excess dye. All experiments were performed at 25±1°C, with a perfusion rate of ~0.4 ml/minute. Cells were imaged with a Nikon TE200 inverted fluorescence microscope. Images were obtained every 10 seconds using a ×40 objective and a Hamamatsu Orca 1 cooled CCD camera controlled by iQ software (Andor Technology, Belfast, UK).

Data were processed offline using iQ as described previously (Kirkman-Brown et al., 2000). For each cell, Microsoft Excel was used to calculate the mean and 95% confidence interval of fluorescence intensity for (1) 14 images during the control period ( $Con \pm con$ ), (2) 14 images from minute 3 after treatment ( $A \pm a$ ) and, (3) 14 images from minute 6 after treatment ( $B \pm b$ ). At each sampling point the response was considered significant if:

$$X - x > Con + con,$$

where 'X' and 'x' are the mean and 95% confidence interval for that sampling point, and 'Con' and 'con' are the mean and 95% confidence interval for the control period. In experiments with two or more treatments, the same procedure was followed, by defining additional 'control' periods. Cells were sorted into those showing increase, decrease or no change in fluorescence after treatment. Visual examination of fluorescence-time plots confirmed that this procedure provided an accurate sorting of responses. More complex [ $\text{Ca}^{2+}$ ]<sub>i</sub> responses (such as oscillations) were quantified by direct observation of time-fluorescence intensity plots. Values in the text giving frequency of each response type are mean±s.e.m. Microsoft Excel was used to perform paired or unpaired *t* tests as appropriate.

### Assay of sperm protein S-nitrosylation and visualisation of S-nitrosoproteins

S-nitrosylation of proteins in human spermatozoa was assessed using the biotin switch assay as described previously (Lefièvre et al., 2007).

To visualise S-nitrosoproteins in sperm exposed to female reproductive tract-synthesised NO, sperm (50 million cells/ml) were incubated with fresh human tubal and endometrial explants (fragments ~ 3 mm<sup>3</sup>) in 50  $\mu\text{l}$  DMEM F12 medium (Gibco # 11320), supplemented with 150 pg/ml  $17\beta$ -oestradiol (Sigma, E8875) at 37°C in 5%  $\text{O}_2$ /6%  $\text{CO}_2$  balance  $\text{N}_2$  for 2 hours. Sperm were then retrieved and fixed on slides using 4% formaldehyde and S-nitrosoproteins were detected using a method adapted from Yang and Loscalzo (Yang and Loscalzo, 2005), as described previously (Lefièvre et al., 2007). This method depends on blocking thiols with a thiol-reactive agent (MMTS) followed by reduction of S-nitrosothiols with ascorbate, and labelling with fluorescently tagged methanethiosulfonate (MTSEA).

### Flagellar activity assessment

Samples were prepared and capacitated as described above and spermatozoa were introduced into the chamber and observed under phase-contrast microscopy. Loosely attached cells with a freely motile flagellum were then selected to assess flagellar activity (images acquired at 1 Hz). Using the mid-point of the midpiece as a reference point, frame-to-frame displacement was measured throughout the experiments using the ImageJ MTrackJ plugin and plotted against time.

### Materials

sEBSS contained (in mM): 1  $\text{NaH}_2\text{PO}_4$ , 5.4 KCl, 0.81  $\text{MgSO}_4 \cdot 7\text{H}_2\text{O}$ , 5.5  $\text{C}_6\text{H}_{12}\text{O}_6$ , 2.5  $\text{C}_3\text{H}_3\text{NaO}_3$ , 19  $\text{CH}_3\text{CH}(\text{OH})\text{COONa}$ , 1.8  $\text{CaCl}_2 \cdot 2\text{H}_2\text{O}$ , 25  $\text{NaHCO}_3$  and 116.4 NaCl (pH 7.3-7.4, 285-295 mOsm). In  $\text{Ca}^{2+}$ -free

sEBSS,  $\text{CaCl}_2$  was replaced with NaCl (118.4 mM). Fatty acid-free BSA was from SAFC Biosciences (Lenexa, KS, USA; catalogue number 85041C-50G).

Rabbit polyclonal anti-eNOS, nNOS and iNOS and donkey anti-rabbit Texas Red were from Santa Cruz Biotechnologies (CA, USA). SYTOX Green was from Molecular Probes (OR, USA).

OGB 1-AM was from Invitrogen Molecular Probes (Paisley, UK). PDL was from BD Biosciences (Oxford, UK). Protease inhibitor cocktail tablets were from Roche Diagnostics (Lewes, East Sussex, UK) and EZ-Link Biotin-N-[6-(biotinamido)hexyl]-3'-(2'-pyridyldithio)propionamide (EZ-Link Biotin-HPDP) was from Perbio Science UK (Cramlington, Northumberland, UK). Nitrocellulose membrane was supplied by GE Healthcare UK (St Giles, Bucks, UK), IgG Fraction Monoclonal Mouse Anti-Biotin was supplied by Jackson ImmunoResearch Laboratories (Strattech Scientific, Soham, Cambridgeshire, UK) and Lumi-GLO, an enhanced chemiluminescence kit, was from Insight Biotechnology (Wembley, Middlesex, UK).

All other chemicals referred in the text were from Merck Biosciences (Beeston, Nottingham, UK), except progesterone, 1H-[1,2,4]oxadiazolo[4,3-a]quinoxalin-1-one (ODQ), DMSO, Pluronic F-127 and 8-bromoguanosine-3',5'-cyclophosphate sodium salt (8-bromo cGMP), which were from Sigma-Aldrich (Poole, Dorset, UK).

## RESULTS

### Human oviduct and cumulus express NOS

To confirm that human sperm encounter increased NO concentrations upon approaching the oocyte, we first assessed the expression of NOS in oviduct explants and in isolated fragments of human cumulus. Antibodies for eNOS showed the presence of this isoform in virtually every cell of human oviductal (ampullary) primary cultures, human cumulus fragments and COV 434 (human granulosa) cell line (Fig. 1). Similar results were obtained with antibodies specific for nNOS, and iNOS was clearly present in oviduct (see Figs S1 and S2 in the supplementary material). We used DAF to visualise NO synthesis in human cumulus fragments and oviduct explants. After DAF loading, we observed a rapid increase in fluorescence in all cells, indicative of NO synthesis (see Fig. S3 in the supplementary material). In cumulus fragments, this was blocked by 1 mM L-NAME, but generation of NO by oviduct explants appeared to be insensitive to this inhibitor (not shown). Incubation of human sperm under the same conditions did not result in a detectable fluorescent signal (not shown), indicating that NOS activity in sperm is much lower than in the cumulus or oviduct. Mouse cumulus also actively synthesised NO but only a subset of cells ( $\approx 10\%$ ) became stained by DAF (see Fig. S3 in the supplementary material).

### NO donors cause elevation of human sperm $[\text{Ca}^{2+}]_i$

Expression of active NOS in oviduct and cumulus indicates that sperm will encounter NO as they approach the oocyte. To investigate the possible effect of this stimulus on sperm  $[\text{Ca}^{2+}]_i$  (which regulates motility), we applied NO donors to sperm loaded with OGB. Spermine NONOate (100  $\mu\text{M}$ ) caused a gradual but significant rise in  $[\text{Ca}^{2+}]_i$  ( $73 \pm 5\%$  of cells;  $n=8$ ). The latency of the effect was 0-2 minutes and fluorescence typically stabilised at  $\sim 20\%$  above control levels after 10 minutes (Fig. 2A). In 19% of cells, oscillations were superimposed on the NO-induced elevation of  $[\text{Ca}^{2+}]_i$  (Fig. 2A, red trace). This action of NONOate was dose dependent: application of 1  $\mu\text{M}$  induced a discernible increase in fluorescence in only 25% of cells. When NONOate concentration was subsequently raised to 10  $\mu\text{M}$ , the majority of cells ( $>70\%$ ) showed a gradual increase in fluorescence of 1-30% over 5-10 minutes. Subsequent application of 100  $\mu\text{M}$  NONOate caused little further increase in fluorescence

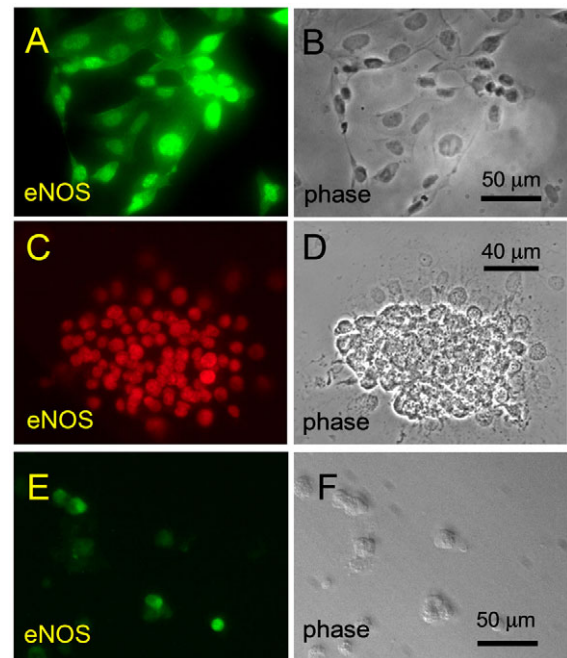

**Fig. 1. Expression of eNOS in human oviductal and cumulus cells.** (A, C, E) Staining of human oviductal (ampullary) primary culture (A), human cumulus (C) and human granulosa cell line (COV 434; E) for eNOS. (B, D, F) Corresponding phase-contrast images of these samples.

but clearly enhanced the occurrence of  $[\text{Ca}^{2+}]_i$  oscillations (see Fig. S4 in the supplementary material). Similar results were obtained in three experiments. To determine whether this rise in  $[\text{Ca}^{2+}]_i$  was dependent primarily upon influx of  $\text{Ca}^{2+}$  at the plasmalemma, we incubated cells in saline with no added  $\text{Ca}^{2+}$  (Fig. 2B), where  $[\text{Ca}^{2+}]_o \leq 5 \mu\text{M}$  (Harper et al., 2004). Under these conditions, a slow elevation in  $[\text{Ca}^{2+}]_i$  occurred in  $64 \pm 12\%$  of cells ( $n=4$ ; NS compared with sEBSS) but oscillations were rarely seen. The localisation (primarily neck/midpiece, spreading into the posterior head) (Fig. 2C) and mean amplitude (Fig. 2D) of the response to NO were similar under the two conditions. Upon washout of spermine NONOate,  $[\text{Ca}^{2+}]_i$  fell rapidly but then showed a partial recovery in many cells. When the NONOate was reintroduced, most cells again responded, the increase in  $[\text{Ca}^{2+}]_i$  being more pronounced and usually occurring as a series of oscillations in the neck/midpiece (Fig. 2E).

### Mobilisation of $\text{Ca}^{2+}$ by NO is not dependent on stimulation of guanylate cyclase

The 'classic' target for NO in its role as a messenger is soluble guanylate cyclase (sGC). Though cGMP (and therefore sGC activity) is low in mammalian sperm, there is evidence that effects of NO on acrosome reaction and possibly other sperm functions are exerted through this pathway (Herrero et al., 1998; Revelli et al., 2001). To investigate whether sGC might mediate NO-induced elevation of  $[\text{Ca}^{2+}]_i$ , we first examined the effects of the membrane-permeant analogue 8-bromo cGMP (100  $\mu\text{M}$ ). Upon application of 8-bromo cGMP, OGB fluorescence increased ( $77 \pm 9\%$  of cells;  $n=4$ ) to a plateau, stabilising after 2-3 minutes (Fig. 3A). However, unlike the action of NONOate, when the experiments were repeated in low- $\text{Ca}^{2+}$  saline the effect of cGMP, though detectable ( $63 \pm 9\%$  of cells;  $n=3$ ), was reduced in amplitude by over 70% (Fig. 3B, C). Thus,

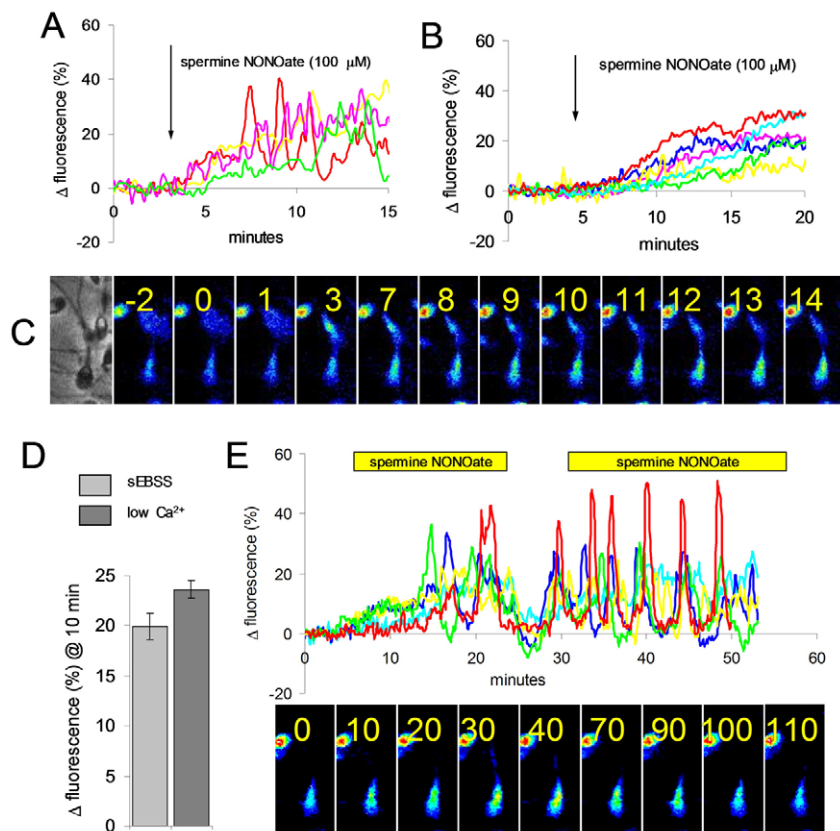

**Fig. 2. NO mobilises stored  $\text{Ca}^{2+}$  in sperm.** (A) Spermine NONOate causes a slowly developing rise in  $[\text{Ca}^{2+}]_i$  in human sperm. Responses of four separate cells are shown. Red trace shows example of a cell generating  $[\text{Ca}^{2+}]_i$  oscillations. (B) In low- $\text{Ca}^{2+}$  medium ( $[\text{Ca}^{2+}]_o \leq 5 \mu\text{M}$ ), the response to NONOate was similar, but oscillations were rarely seen. Responses of seven cells are shown. (C) Pseudocolour image series showing NONOate-induced rise in  $[\text{Ca}^{2+}]_i$  in the sperm neck/midpiece. Numbers show minutes since application of  $100 \mu\text{M}$  spermine NONOate. (D) Mean normalised increase in fluorescence 10 minutes after application of  $100 \mu\text{M}$  spermine NONOate to cells bathed in sEBSS (271 cells; three experiments) and low- $\text{Ca}^{2+}$  sEBSS (214 cells; three experiments). (E) A rapid decrease in  $[\text{Ca}^{2+}]_i$  followed washout of NONOate, followed by slow recovery. Upon re-introduction of NONOate, many cells generated oscillations in the neck/midpiece region. Responses of five individual cells shown. Lower panel shows pseudocolour images series of a single  $[\text{Ca}^{2+}]_i$  oscillation (numbers show time in seconds).

cGMP does elevate  $[\text{Ca}^{2+}]_i$  in human sperm but appears to do so by increased  $\text{Ca}^{2+}$  influx rather than by mobilisation of intracellular stores. To confirm that the response to NONOate was not due to activation of sGC, we used the sGC inhibitor ODQ. Approximately 10 minutes pre-treatment with  $10 \mu\text{M}$  ODQ, a dose in excess of that

required to inactivate the enzyme (Schrammel et al., 1996; Garthwaite et al., 1995), exerted no inhibitory effect on the response to NO (Fig. 3D,E). We repeated these experiments using  $100 \mu\text{M}$  ODQ and again a clear response to NO was apparent (data not shown).

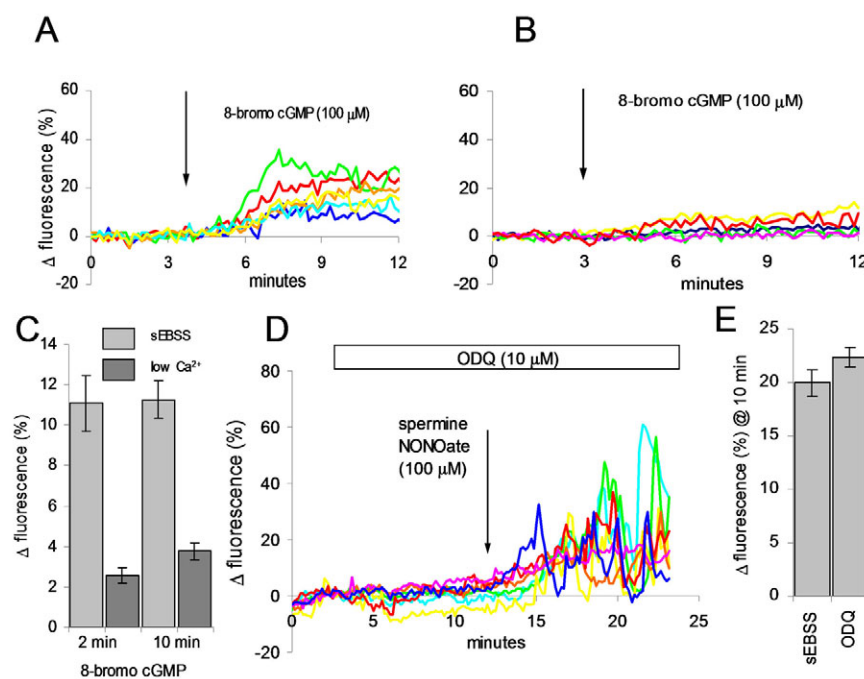

**Fig. 3. Mobilisation of stored  $\text{Ca}^{2+}$  by NO does not involve cGMP.** (A)  $100 \mu\text{M}$  8-bromo cGMP causes rapid elevation of  $[\text{Ca}^{2+}]_i$  in human sperm. Responses of six cells are shown. (B) Response to 8-bromo cGMP is greatly reduced and slowed in cells exposed to cGMP in low- $\text{Ca}^{2+}$  saline. Responses of five cells are shown. (C)  $\text{Ca}^{2+}$  dependence of the response to  $100 \mu\text{M}$  8-bromo cGMP. Light-grey bars show responses of cells bathed in sEBSS (72 cells; two experiments); dark-grey bars show cells bathed in low- $\text{Ca}^{2+}$  sEBSS (122 cells; three experiments). (D) Pre-treatment with the sGC inhibitor ODQ ( $10 \mu\text{M}$ ; white bar) does not inhibit the increase in  $[\text{Ca}^{2+}]_i$  induced by exposure to  $100 \mu\text{M}$  spermine NONOate (arrow). Responses of seven cells are shown. (E) Mean normalised increase in fluorescence 10 minutes after application of  $100 \mu\text{M}$  spermine NONOate under control conditions (208 cells; three experiments) and after pre-treatment with  $10 \mu\text{M}$  ODQ (267 cells; three experiments). Pre-treatment did not modify the amplitude of the response.

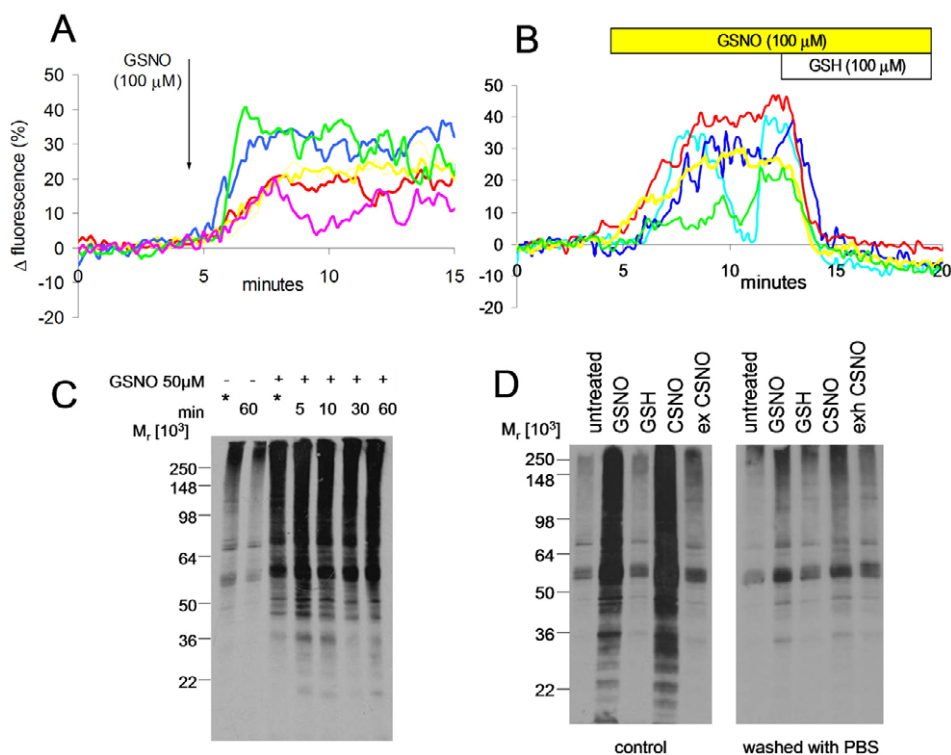

**Fig. 4. NO and protein S-nitrosylation in sperm.** (A) 100  $\mu\text{M}$  GSNO, an S-nitrosylating agent, causes a rise in  $[\text{Ca}^{2+}]_i$  similar to that seen with NONOate but the onset of the effect is more rapid. Responses of six cells are shown. (B) 100  $\mu\text{M}$  GSH rapidly reverses the action of 100  $\mu\text{M}$  GSNO on sperm  $[\text{Ca}^{2+}]_i$ . Responses of five cells are shown. (C) GSNO causes rapid S-nitrosylation of sperm proteins: lane 1 shows background levels in cells processed immediately for assay (indicated by \*); lane 2 shows that, after 60 minutes of incubation of the cells in sBSS, this level does not change; lanes 3, 4, 5, 6 and 7 show increased S-nitrosylation in cells processed for assay immediately upon exposure to 50  $\mu\text{M}$  GSNO (\*), and those incubated with GSNO for 5, 10, 30 and 60 minutes, respectively. S-nitrosylation reaches near steady-state levels in the sample processed immediately ( $\sim 5$  minutes for preliminary centrifugation; see Materials and methods). (D) S-nitrosylation of sperm proteins is rapidly reversible. Left panel shows S-nitrosylated proteins in untreated cells incubated for 10 minutes (lane 1), cells exposed to GSNO and cys-SNO (lanes 2 and 4), and cells exposed to GSH and exhausted cys-NO (lanes 3 and 5; controls). Right panel shows same treatments but cells were washed in PBS immediately before processing for the assay. S-nitrosylation caused by GSNO and CSNO is rapidly reversed upon removal of the agent.

### S-nitrosylglutathione (GSNO), an S-nitrosylating agent, mobilises $\text{Ca}^{2+}$

An alternative action of NO is to modify protein function directly by S-nitrosylation of specific target motifs, an action of NO that we recently detected in human sperm (Lefièvre et al., 2007). S-nitrosylglutathione (GSNO), a membrane-impermeant protein S-nitrosylating agent (Ji et al., 1999; Zaman et al., 2006) can act at intracellular targets, probably by generation of the membrane permeant product cys-NO (Zhang and Hogg, 2004). Upon application of 100  $\mu\text{M}$  GSNO, a significant elevation of  $[\text{Ca}^{2+}]_i$  occurred in  $70 \pm 5\%$  of sperm ( $n=7$ ). This effect was rapid in comparison to the action of NO, reaching a plateau in  $\sim 3$  minutes in most cells (Fig. 4A).

Decomposition of GSNO can lead to release of NO. To test the possibility that GSNO was acting as an NO donor (rather than as an S-nitrosylating agent), we co-applied 100  $\mu\text{M}$  glutathione (GSH). Under these conditions, decomposition of GSNO (and generation of NO) is accelerated (Singh et al., 1996), but formation of membrane permeant product cys-NO, leading to direct S-nitrosylation of intracellular proteins is suppressed (Zhang and Hogg, 2004). When GSH was applied in the presence of GSNO there was a rapid fall in  $[\text{Ca}^{2+}]_i$  (Fig. 4B). We conclude that mobilisation of  $\text{Ca}^{2+}$  by GSNO is by a 'direct' action to nitrosylate target proteins in the sperm.

### Kinetics of sperm protein S-nitrosylation parallel those of $\text{Ca}^{2+}$ mobilisation

$[\text{Ca}^{2+}]_i$  responses to GSNO were rapid ( $\sim 3$  minutes to peak) (Fig. 4A). Reversal of  $[\text{Ca}^{2+}]_i$  elevation in the presence of GSH was similarly rapid (Fig. 4B), as was reduction in  $[\text{Ca}^{2+}]_i$  upon washout of spermine NONOate (Fig. 2E). We therefore investigated the kinetics and reversibility of protein S-nitrosylation in sperm exposed to GSNO. When sperm were processed for the biotin switch assay immediately after exposure to 50  $\mu\text{M}$  GSNO ( $\sim 5$  minutes for preliminary centrifugation; see Materials and methods), S-nitrosylation was already at steady-state, with further incubation (up to 60 minutes) having very little effect (Fig. 4C). Conversely, when cells incubated under S-nitrosylating conditions were washed in PBS, S-nitrosylation was immediately reversed (Fig. 4D).

### Mobilisation of $\text{Ca}^{2+}$ by NO and GSNO are reversed by DTT

Dithiothreitol (DTT) is a cell-permeant thiol-reducing agent that, even at low doses (1 mM), effectively reverses biological effects induced by protein S-nitrosylation (Stoyanovsky et al., 1997). After a 1 hour exposure of intact sperm to 100  $\mu\text{M}$  GSNO, application of 1 mM DTT caused complete reversal of S-nitrosylation within 5 minutes (Fig. 5A). Similarly, when 1 mM DTT was applied to sperm 10-15 minutes after exposure to spermine NONOate (when

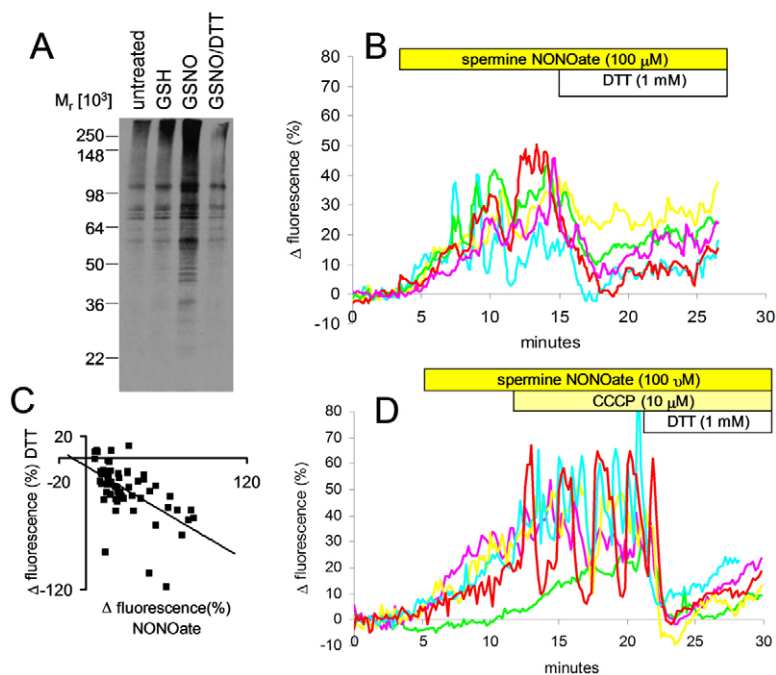

mobilisation of  $\text{Ca}^{2+}$  by NO was well established), we observed a rapid fall in  $[\text{Ca}^{2+}]_i$ . Mean fluorescence ( $R_{\text{tot}}$ ) fell to  $\sim 5\%$  above control levels and some cells returned to levels recorded before application of NO (Fig. 5B). Similar effects were seen in four other experiments. The amplitude of the fall in fluorescence induced by DTT was correlated with that of the preceding NONOate-induced rise (Fig. 5C), consistent with an action of DTT to reverse the effect of exposure to NO. In most cells, there was then a small increase in fluorescence of 5–10% over the following 10 minutes. A rapid reversal of the action of GSNO on  $[\text{Ca}^{2+}]_i$  also occurred upon application of 1 mM DTT (not shown).

Oxidation of thiols can cause  $\text{Ca}^{2+}$  mobilisation from mitochondria. This effect is reversed by DTT (Halestrap et al., 1997; Pariente et al., 2001; McStay et al., 2002) and might thus contribute to the observed  $[\text{Ca}^{2+}]_i$  responses. We therefore exposed NO-treated cells to 10  $\mu\text{M}$  carbonyl cyanide *m*-chlorophenylhydrazone (CCCP) prior to DTT exposure to collapse the mitochondrial inner membrane potential and mobilise mitochondrial  $\text{Ca}^{2+}$  (Konji et al., 1985). In most cells, there was a visible increase in  $[\text{Ca}^{2+}]_i$  upon CCCP application, consistent with participation of mitochondria in  $[\text{Ca}^{2+}]_i$  buffering (Wennemuth et al., 2003) and many of the cells then showed  $[\text{Ca}^{2+}]_i$  oscillations (Fig. 5D, red and blue traces). When 1 mM DTT was then applied to these cells, recovery of  $[\text{Ca}^{2+}]_i$  occurred as before, despite the inability of uncoupled mitochondria to accumulate  $\text{Ca}^{2+}$  (Fig. 5D).

The efficacy of DTT to reduce  $[\text{Ca}^{2+}]_i$  was such that we investigated whether an effect could be seen in cells not previously exposed to NO. In most cells ( $63 \pm 7\%$ ,  $n=3$ ) this was the case, but the amplitude of this effect was small ( $\sim 5\%$ ). In most of these cells, there was then a slight recovery ( $\sim 2\%$ ) over the following 5 minutes (not shown).

### Incubation of sperm with human oviduct explants causes protein S-nitrosylation

To determine whether NO production by tissues encountered by the sperm is sufficient to induce protein S-nitrosylation, we incubated sperm with human oviduct explants. Sperm retrieved from these

### Fig. 5. Thiol reducing agents reverse NO effects.

(A) DTT rapidly reverses nitrosylation of sperm proteins. Lane 1 shows endogenous S-nitrosylation in cells incubated in sEBSS for 60 minutes. Lanes 2 and 3 show cells incubated in the presence of 1 mM GSH (control) and 100  $\mu\text{M}$  GSNO. Lane 4 shows cells incubated as for lane 3 but 1 mM DTT was added to the incubation 5 minutes before processing for the assay. (B) DTT reverses the action of 100  $\mu\text{M}$  spermine NONOate. Upon application of 1 mM DTT, the increase in fluorescence induced by spermine NONOate is rapidly reduced or completely reversed. Responses of five separate cells are shown. (C) The DTT-induced decrease in fluorescence is correlated with the preceding NONOate-stimulated increase in fluorescence. Scattergram shows data from a single experiment, representative of five repeats.  $R^2=0.33$ . (D) The action of DTT is not due to  $e^-$ -dependent mitochondrial  $\text{Ca}^{2+}$  accumulation. After application of 100  $\mu\text{M}$  spermine NONOate to mobilise  $\text{Ca}^{2+}$ , the cells were exposed to 10  $\mu\text{M}$  CCCP to collapse the mitochondrial inner membrane potential. The effect of subsequent application of 1 mM DTT resembled that seen in cells with functioning mitochondria. Responses of five cells are shown.

incubations and processed for labelling of S-nitrosothiols (Lefievre et al., 2007) showed levels of labelling equivalent in intensity and distribution to that induced by parallel incubation with 100  $\mu\text{M}$  GSNO and slightly greater than that seen with 100  $\mu\text{M}$  NONOate (Fig. 6). Sperm incubated with oviduct showed higher levels of sperm S-nitrosylation (labelling with MTSEA) than did those incubated with endometrium.

### Interaction of the $\text{Ca}^{2+}$ -mobilising effects of NO and progesterone

We have shown previously that progesterone cyclically mobilises  $\text{Ca}^{2+}$  stored in a membranous compartment in the sperm neck/midpiece region (Harper et al., 2004; Harper and Publicover,

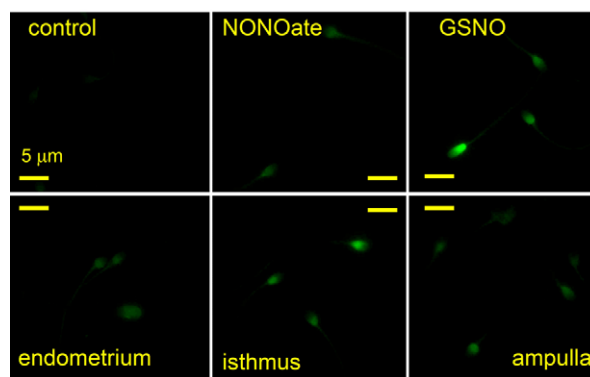

### Fig. 6. NO production by female reproductive tract cells induces S-nitrosylation in human sperm.

S-nitrosylated proteins were identified using fluorescently tagged methanethiosulfonate, as described in the text. Negligible levels of labelling were present in controls but treatment with 100  $\mu\text{M}$  spermine NONOate or GSNO caused clear labelling, particularly at the back of the sperm head. Incubation of sperm with primary cultures derived from endometrial or tubal explants (ampulla and isthmus) induced levels of S-nitrosylation at least as much as those seen with NONOate.

2005; Bedu-Addo et al., 2007), an effect that involves activation of ryanodine receptors (RyRs) (Harper et al., 2004) (reviewed by Harper and Publicover, 2005). RyRs are known to be positively regulated by S-nitrosylation (Stoyanovsky et al., 1997; Meissner, 2004) and RyR2 was identified in the nitrosoproteome of human sperm (Lefièvre et al., 2007). As the action of NO on sperm  $[Ca^{2+}]_i$  is by S-nitrosylation (leading to mobilisation of stored  $Ca^{2+}$ ), interaction or synergism between the effects of these two agents, both of which will be encountered by sperm approaching the oocyte, might be anticipated.

In control experiments, the  $[Ca^{2+}]_i$  transient induced by 3  $\mu$ M progesterone was typically 2.0-2.5 minutes in duration (Kirkman-Brown et al., 2000) (Fig. 7A, insert). When cells were pre-treated with 100  $\mu$ M spermine NONOate (10 minutes) then exposed to progesterone in the continued presence of the NO donor, this response were clearly altered. Although 2- to 3-minute transients were still observed (Fig. 7A, brown and yellow traces), the majority of cells showed a  $[Ca^{2+}]_i$  plateau (Fig. 7A, red and green traces) or a normal peak with a pronounced ‘shoulder’ (Fig. 7A, orange, pink and blue traces). Analysis of transient duration (from start of rise to inflexion at end of falling phase) showed that after exposure to NONOate prolonged responses became much more common (Fig. 7B). In three pairs of experiments (control and NO treated cells from the same sample) (see Fig. 7B), pre-treatment with NONOate increased the proportion of responses of at least 2.5 minutes from  $42 \pm 8\%$  to  $92 \pm 3\%$  ( $P < 0.025$ , paired *t*-test). To investigate whether the effect of pre-treatment with NONOate would persist in the

absence of the NO donor, we carried out parallel experiments in which NONOate was washed off simultaneously with the introduction of 3  $\mu$ M progesterone. In these experiments, responses to progesterone resembled those of non-pretreated cells (Fig. 7B): the proportion of transients of at least 2.5 minutes in two experiments were 40% and 45% (not significant compared with parallel experiments without pretreatment; paired *t*-test).

### Synergism of NO and progesterone in regulating flagellar beat mode

Mobilisation of  $Ca^{2+}$  stored in the neck/midpiece region of human sperm by progesterone or by 4-aminopyridine causes an increase in midpiece bending and flagellar displacement, which is clearly visible in loosely tethered cells (Harper et al., 2004; Bedu-Addo et al., 2007; Bedu-Addo et al., 2008). We therefore imaged cells under phase contrast (1 Hz acquisition rate) to assess the midpiece (and thus flagellar) displacement. In ~70% of cells exposed to 3  $\mu$ M progesterone, there was a brief (30-50 seconds) increase in frame-to-frame flagellar displacement (Fig. 7C) (representative cell from over 150 cells in two experiments), consistent with increased flagellar activity during the  $[Ca^{2+}]_i$  transient (Fig. 7A, insert). When cells were treated with 100  $\mu$ M spermine NONOate for 10 minutes, there was no significant effect on flagellar beat mode. Subsequent application of 3  $\mu$ M progesterone (in the continued presence of the NO donor) did not alter the proportion of cells showing a response (~80%), but the enhancement of flagellar activity (measured as an increase in frame-to-frame midpiece displacement) was maintained

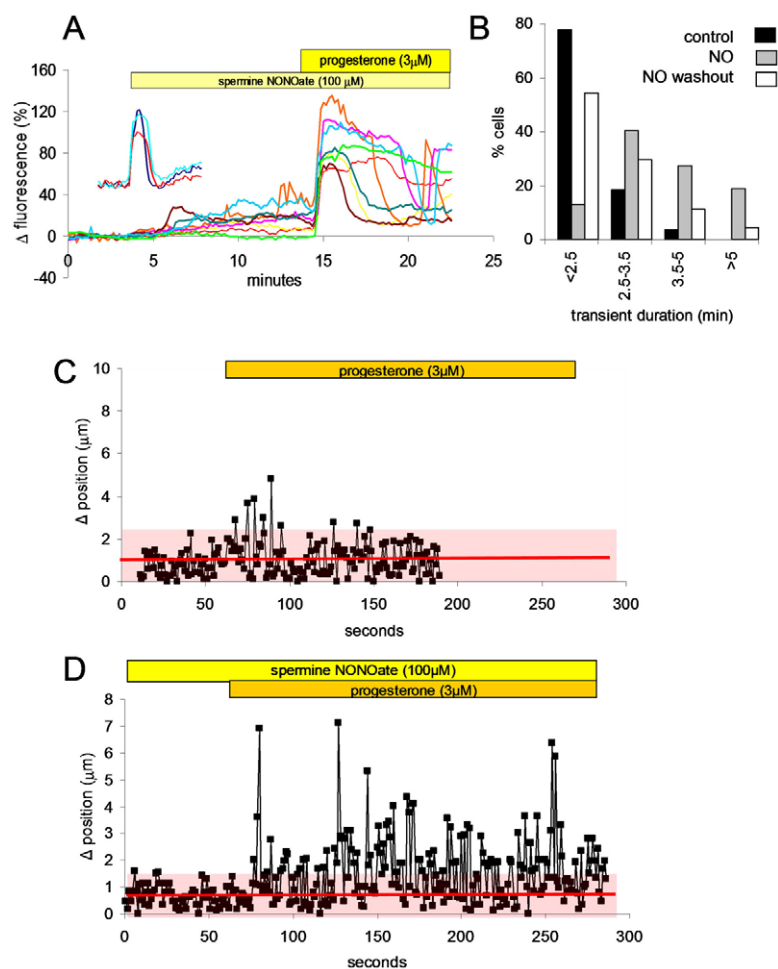

**Fig. 7. Pre-treatment with 100  $\mu$ M spermine NONOate potentiates responses of sperm to 3  $\mu$ M progesterone.**

(A) When sperm were exposed to 3  $\mu$ M progesterone after pre-treatment with spermine NONOate (100  $\mu$ M for 10 minutes), the initial  $[Ca^{2+}]_i$  transient was enlarged (in some cells) and significantly prolonged compared with that seen in control cells (inset shows three single cell responses, scales as for main plot). Responses of eight cells are shown. (B) Co-stimulation with spermine NONOate increases the proportion of cells in which a prolonged  $[Ca^{2+}]_i$  transient occurs in response to stimulation with 3  $\mu$ M progesterone. Data are plotted as a percentage of cells in each class (defined by  $[Ca^{2+}]_i$  transient duration). Control cells (black bars;  $n=27$ ) were from the same sample as cells exposed to NO before and during progesterone stimulation (grey bars;  $n=69$ ) and cells in which NO was washed off as progesterone was applied (white bars; 44 cells). (C) Progesterone (3  $\mu$ M) causes a brief increase in flagellar displacement. Red line and shading show the mean  $\pm$  2s.d. of frame-to-frame midpiece displacement during the control period. Graph shows the response of one cell (representative of over 150 cells in two experiments). (D) Pre-treatment with spermine NONOate (100  $\mu$ M) prolonged and intensified the effect of progesterone on flagellar activity. Red line and shading show the mean  $\pm$  2s.d. of frame-to-frame midpiece displacement during the control period. The graph shows response of one sperm cell (representative of over 100 cells in two experiments).

for the duration of recording ( $\approx 4$  minutes), including a series of peaks (Fig. 7D) (representative cell from over 100 cells in two experiments). The kinetics of this increase in midpiece displacement were consistent with those of the enhanced  $[Ca^{2+}]_i$  response to progesterone seen in sperm pre-treated with NONOate (Fig. 7A,B). Supplementary movies show examples of cells responding to progesterone in the presence and absence of 100  $\mu M$  spermine NONOate.

## DISCUSSION

Application of spermine NONOate to capacitated human sperm induced a clear rise in  $[Ca^{2+}]_i$  in the neck/midpiece of most cells (Fig. 2), leading to modulation of flagellar activity (Fig. 7; see below). Elevation of  $[Ca^{2+}]_i$  was not sensitive to omission of  $Ca^{2+}$  from the medium ( $\sim 1000$ -fold reduction in  $[Ca^{2+}]_o$ ) (Fig. 2B,D), so this effect reflects mobilisation of stored  $Ca^{2+}$  by NO.

The primary actions of NO in target tissues are: (1) activation of soluble guanylate cyclase (sGC), leading to a rise in  $[cGMP]$  and actions mediated through PKG or through direct action on cyclic nucleotide-gated channels; and (2) direct modulation of protein function by S-nitrosylation of exposed cysteine residues (Davis et al., 2001; Ahern et al., 2002). It has been suggested that NO acts as a chemoattractant for human sperm, acting through stimulation of sGC (Miraglia et al., 2007) and when we exposed human sperm to cGMP, we observed a sustained rise in  $[Ca^{2+}]_i$  not dissimilar to that seen with NO. However, this effect was clearly dependent on  $[Ca^{2+}]_o$ , consistent with generation by  $Ca^{2+}$  influx and not store mobilisation (Fig. 3A-C). Furthermore, saturating doses of ODQ, an effective inhibitor of sGC, did not modify the response to NO (Fig. 3D,E). By contrast, induction of AR by NO was blocked by the same drug (W. C. Ford, unpublished). We have shown recently that NO, at the concentrations used here, causes S-nitrosylation of a number of sperm proteins (Lefièvre et al., 2007), suggesting that this alternative effect of NO could underlie our observations. Consistent with this interpretation we found that:

- (1) GSNO, an S-nitrosylating agent but very poor generator of NO (Jarboe et al., 2008) acted similarly to NO but more rapidly (Fig. 4A).
- (2) Assessment of sperm protein S-nitrosylation by the biotin switch method (Foster and Stamler, 2004; Lefièvre et al., 2007) showed that, like the effect of GSNO on  $[Ca^{2+}]_i$ , GSNO-induced S-nitrosylation was rapid, occurring in 5 minutes or less (the minimum period that could be assessed using the assay) (Fig. 4C) and was immediately reversed by washout of GSNO (Fig. 4D) or co-application of 1 mM DTT (Fig. 5A).
- (3) The effect of GSNO on  $[Ca^{2+}]_i$  was largely reversed by co-application of GSH (Fig. 4B). GSH enhances breakdown of GSNO to liberate NO (Singh et al., 1996) but will inhibit generation of membrane permeant cys-NO, which is required for protein S-nitrosylation by GSNO in intact cells (Zhang and Hogg, 2004).
- (4) The action of NO was rapidly reversed by 1 mM DTT (Fig. 5B). Of particular significance here is the relationship between the increase in OGB fluorescence caused by NO and the subsequent fall upon application of DTT. The characteristics of non-ratiometric fluorescence  $[Ca^{2+}]_i$  measurements are such that, as  $[Ca^{2+}]_i$  increases, the change in fluorescence for a given increment in  $[Ca^{2+}]_i$  is reduced (see Fig. S5A in the supplementary material). The observed negative correlation (Fig. 5C) is consistent with reversal of the action of NO by DTT (see Fig. S5D in the supplementary material), whereas action of DTT to reduce  $[Ca^{2+}]_i$  by a mechanism unrelated to the preceding effect of NO would lead to a positive correlation (see Fig. S5E in the supplementary material).

We conclude that DTT reverses the action of NO and that NO-induced mobilisation of stored  $Ca^{2+}$  reflects direct modulation of protein function by S-nitrosylation. It is of interest that, when NONOate was washed off and reintroduced after 5-10 minutes, the effect of NO was apparently enhanced, particularly the generation of  $[Ca^{2+}]_i$  oscillations (Fig. 2E). Protein S-nitrosylation reverses rapidly upon washout of NONOate (Fig. 4D) so this persistence of effect may reflect increased  $Ca^{2+}$  leak at the plasmalemma (and consequent filling of the store), perhaps owing to increased  $[cGMP]$ .

Progesterone mobilises  $Ca^{2+}$  stored in the neck/midpiece of human sperm, by a mechanism involving activation of RyRs, leading to  $[Ca^{2+}]_i$  oscillations strikingly similar to those described here (Harper et al., 2004) (Fig. 2A). RyRs are localised to the neck/midpiece (Harper et al., 2004; Lefièvre et al., 2007) and we have shown recently that RyR2 is a target for S-nitrosylation in human sperm (Lefièvre et al., 2007). As S-nitrosylation (or S-oxidation by HNO) of RyRs increases open probability of these channels and mobilises microsomal  $Ca^{2+}$  (Stoyanovsky et al., 1997; Cheong et al., 2005), we suggest that an action on these receptors is the most likely cause of the  $Ca^{2+}$ -mobilising abilities of NO and GSNO in human sperm. Consistent with convergence of the actions of progesterone and NO, pre-treatment of cells with spermine NONOate prolonged significantly the  $[Ca^{2+}]_i$  transient induced by 3  $\mu M$  progesterone (Fig. 7A,B). This effect was dependent upon the continued presence of NO, with no synergism being observed when the NO donor was washed off simultaneously with introduction of progesterone. In effect, this means that the actions of NO are reversed within 2.5 minutes (duration of the 'control' action of progesterone), consistent with the rapid reversibility of protein S-nitrosylation in sperm.

Though potential sources of NO are present throughout the female reproductive tract, it is probable that NO encountered by sperm in the fallopian tube and upon approaching and entering the cumulus oophorus provides a particularly potent stimulus (Rosselli et al., 1996; Ekerhovd et al., 1999; Hattori et al., 2001; Reyes et al., 2004; Tao et al., 2004; Lapointe et al., 2006). Human cumulus samples expressed constitutive forms of NOS (as did COV434 human granulosa cells) and all three NOS isoforms were present in the oviduct (Fig. 1; see Figs S1 and S2 in the supplementary material). Co-incubation of human sperm with human oviductal explants was at least as effective in inducing S-nitrosylation as was the exposure of sperm to spermine NONOate or GSNO (Fig. 6). Thus, the reversible NO-induced mobilisation of  $Ca^{2+}$  stored in the neck region of the sperm, which we describe here, can occur in vivo. The recent observation that NO induces chemotaxis (Miraglia et al., 2007), though of great interest, is most unlikely to relate to our findings. The effect was at a dose of GSNO 500-1000 $\times$  lower than that used here. Chemotactic effects are highly concentration specific, being lost when the concentration of the attractant is increased above the effective dose. Furthermore, chemotaxis was exerted through activation of sGC (mimicked by cGMP and sensitive to ODQ). The effect described here is seen with 50-100  $\mu M$  GSNO (and 100  $\mu M$  NONOate) and is exerted through protein S-nitrosylation (not mimicked by cGMP, insensitive to ODQ).

Our observation that progesterone, which is also present in the female reproductive tract and is synthesised by cells of the cumulus (Chian et al., 1999; Mingoti et al., 2002; Yamashita et al., 2003), can act synergistically with NO to mobilise  $Ca^{2+}$  is intriguing. Progesterone has been reported to have a weak hyperactivating effect on human sperm (Uhler et al., 1992; Yang et al., 1994; Jaiswal et al., 1999). In the presence of NO, this effect might be expected to be enhanced, reflecting the increased duration of  $[Ca^{2+}]_i$  elevation



that occurs under these circumstances. Examination of cells exposed to progesterone in the presence of NO confirmed that, though 100  $\mu\text{M}$  spermine NONOate alone had little effect on activity of the flagellum, the transient action of progesterone on flagellar beating was transformed into a prolonged enhancement characterised by increased excursion of the midpiece (Fig. 7D). We propose that, within the oviduct, the synergistic actions of NO (by S-nitrosylation) and progesterone to mobilise stored  $\text{Ca}^{2+}$  in the sperm neck/midpiece (probably by activation of RyRs) will modulate flagellar activity, particularly bending in the midpiece (Bedu-Addo et al., 2008), contributing to the hyperactivation that is vital for penetration of the egg vestments.

Our thanks to Dr J. T. Hancock, University of the West of England at Bristol, for his great help with obtaining images of DAF-stained mouse oocytes; to Dr Fleur Moseley for preparation of human cumulus; and to Clinical Oncology, LUMC, the Netherlands for kindly supplying COV434 cells. We thank the donors who contributed to our work and the staff at the Assisted Conception Unit (ACU), Birmingham Women's Hospital, for their help. This work was supported by The Wellcome Trust (078905). G.M.-O. was supported by Fundação para a Ciência e Tecnologia (FCT) Portugal (SFRH/BD/17780/2004) and T.J.C. was supported by the Infertility Research Trust, UK.

#### Supplementary material

Supplementary material for this article is available at <http://dev.biologists.org/cgi/content/full/135/22/3677/DC1>

#### References

- Ahern, G. P., Klyachko, V. A. and Jackson, M. B. (2002). cGMP and S-nitrosylation: two routes for modulation of neuronal excitability by NO. *Trends Neurosci.* **25**, 510-517.
- Arnold, W. P., Mittal, C. K., Katsuki, S. and Murad, F. (1977). Nitric oxide activates guanylate cyclase and increases guanosine 3':5'-cyclic monophosphate levels in various tissue preparations. *Proc. Natl. Acad. Sci. USA* **74**, 3203-3207.
- Bedu-Addo, K., Barratt, C. L., Kirkman-Brown, J. C. and Publicover, S. J. (2007). Patterns of  $[\text{Ca}^{2+}]_i$  mobilization and cell response in human spermatozoa exposed to progesterone. *Dev. Biol.* **302**, 324-332.
- Bedu-Addo, K., Costello, S., Harper, C., Machado-Oliveira, G., Lefèvre, L., Ford, C., Barratt, C. and Publicover, S. (2008). Mobilisation of stored  $\text{Ca}^{2+}$  in the neck region of human sperm – a mechanism for regulation of flagellar activity. *Int. J. Dev. Biol.* **52**, 615-626.
- Braugher, J. M., Mittal, C. K. and Murad, F. (1979). Effects of thiols, sugars, and proteins on nitric oxide activation of guanylate cyclase. *J. Biol. Chem.* **254**, 12450-12454.
- Calabrese, E. J. (2001). Nitric oxide: biphasic dose responses. *Crit. Rev. Toxicol.* **31**, 489-501.
- Calabrese, V., Mancuso, C., Calvani, M., Rizzarelli, E., Butterfield, D. A. and Stella, A. M. (2007). Nitric oxide in the central nervous system: neuroprotection versus neurotoxicity. *Nat. Rev. Neurosci.* **8**, 766-775.
- Cheong, E., Tumble, V., Abramson, J., Salama, G. and Stoyanovsky, D. A. (2005). Nitroxyl triggers  $\text{Ca}^{2+}$  release from skeletal and cardiac sarcoplasmic reticulum by oxidizing ryanodine receptors. *Cell Calcium* **37**, 87-96.
- Chian, R. C., Ao, A., Clarke, H. J., Tulandi, T. and Tan, S. L. (1999). Production of steroids from human cumulus cells treated with different concentrations of gonadotropins during culture *in vitro*. *Fertil. Steril.* **71**, 61-66.
- Creech, M. M., Arnold, E. V., Boyle, B., Muzinich, M. C., Montville, C., Bohle, D. S. and Atherton, R. W. (1998). Sperm motility enhancement by nitric oxide produced by the oocytes of fathead minnows, *Pimephelas promelas*. *J. Androl.* **19**, 667-674.
- Darszon, A., Treviño, C. L., Wood, C., Galindo, B., Rodríguez-Miranda, E., Acevedo, J. J., Hernández-González, E. O., Beltrán, C., Martínez-López, P. and Nishigaki, T. (2007). Ion channels in sperm motility and capacitation. *Soc. Reprod. Fertil.* **65** (Suppl.), 229-244.
- Davis, K. L., Martin, E., Turko, I. V. and Murad, F. (2001). Novel effects of nitric oxide. *Annu. Rev. Pharmacol. Toxicol.* **41**, 203-236.
- Ekerhovd, E., Brännström, M., Weijdegård, B. and Norström, A. (1999). Localization of nitric oxide synthase and effects of nitric oxide donors on the human Fallopian tube. *Mol. Hum. Reprod.* **5**, 1040-1047.
- Foster, M. W. and Stamler, J. S. (2004). New insights into protein S-nitrosylation. Mitochondria as a model system. *J. Biol. Chem.* **279**, 25891-25897.
- Funahashi, H. (2002). Induction of capacitation and the acrosome reaction of boar spermatozoa by L-arginine and nitric oxide synthesis associated with the anion transport system. *Reproduction* **124**, 857-864.
- Garthwaite, J., Southam, E., Boulton, C. L., Nielsen, E. B., Schmidt, K. and Mayer, B. (1995). Potent and selective inhibition of nitric oxide sensitive-guanylyl cyclase by 1H-[1,2,4]oxadiazolo[4,3-a]quinoxalin-1-one. *Mol. Pharmacol.* **48**, 184-188.
- Halestrap, A. P., Woodfield, K. Y. and Connern, C. P. (1997). Oxidative stress, thiol reagents, and membrane potential modulate the mitochondrial permeability transition by affecting nucleotide binding to the adenine nucleotide translocase. *J. Biol. Chem.* **272**, 3346-3354.
- Harper, C. V. and Publicover, S. J. (2005). Reassessing the role of progesterone in fertilization-compartmentalized calcium signalling in human spermatozoa?. *Hum. Reprod.* **20**, 2675-2680.
- Harper, C. V., Barratt, C. L. and Publicover, S. J. (2004). Stimulation of human spermatozoa with progesterone gradients to stimulate approach to the oocyte. Induction of  $[\text{Ca}^{2+}]_i$  oscillations and cyclical transitions in flagellar beating. *J. Biol. Chem.* **279**, 46315-46325.
- Hattori, M. A., Takesue, K., Kato, Y. and Fugihara, N. (2001). Expression of endothelial nitric oxide synthase in the porcine oocyte and its possible function. *Mol. Cell Biochem.* **219**, 121-126.
- Herrero, M. B., Cebal, E., Boquet, M., Viggiano, J. M., Vitullo, A. and Gimeno, M. A. (1994). Effect of nitric oxide on mouse sperm hyperactivation. *Acta Physiol. Pharmacol. Ther. Latinoam.* **44**, 65-69.
- Herrero, M. B., Cebal, E., Franchi, A., Motta, A. and Gimeno, M. F. (1998). Progesterone enhances prostaglandin E2 production via interaction with nitric oxide in the mouse acrosome reaction. *Biochem. Biophys. Res. Commun.* **252**, 324-328.
- Herrero, M. B., de Lamirande, E. and Gagnon, C. (2003). Nitric oxide is a signaling molecule in spermatozoa. *Curr. Pharm. Des.* **9**, 419-425.
- Jaiswal, B. S., Tur-Kaspa, I., Dor, J., Mashiach, S. and Eisenbach, M. (1999). Human sperm chemotaxis: is progesterone a chemoattractant? *Biol. Reprod.* **60**, 1314-1319.
- Jarboe, L. R., Hyduke, D. R., Tran, L. M., Chou, K. J. and Liao, J. C. (2008). Determination of the escherichia coli S-nitrosoglutathione response network using integrated biochemical and systems analysis. *J. Biol. Chem.* **283**, 5148-5157.
- Ji, Y., Akerboom, T. P., Sies, H. and Thomas, J. A. (1999). S-nitrosylation and S-glutathiolation of protein sulfhydryls by S-nitroso glutathione. *Arch. Biochem. Biophys.* **362**, 67-78.
- Joo, B. S., Park, S. H., Park, S. J., Kang, H. S., Moon, H. S. and Kim, H. D. (1999). The effect of nitric oxide on sperm cell function and embryo development. *Am. J. Reprod. Immunol.* **42**, 327-334.
- Kim, B. H., Kim, C. H., Jung, K. Y., Jeon, B. H., Ju, E. J. and Choo, Y. K. (2004). Involvement of nitric oxide during *in vitro* fertilization and early embryonic development in mice. *Arch. Pharm. Res.* **27**, 86-93.
- Kirkman-Brown, J. C., Bray, C., Stewart, P. M., Barratt, C. L. and Publicover, S. J. (2000). Biphasic elevation of  $[\text{Ca}^{2+}]_i$  in individual human spermatozoa exposed to progesterone. *Dev. Biol.* **222**, 326-335.
- Konji, V., Montag, A., Sandri, G., Nordenbrand, K. and Ernster, L. (1985). Transport of  $\text{Ca}^{2+}$  and  $\text{Mn}^{2+}$  by mitochondria from rat liver, heart and brain. *Biochimie* **67**, 1241-1250.
- Lancaster, J. R., Jr (1997). A tutorial on the diffusibility and reactivity of free nitric oxide. *Nitric Oxide* **1**, 18-30.
- Lapointe, J., Roy, M., St-Pierre, I., Kimmins, S., Gauvreau, D., MacLaren, L. A. and Bilodeau, J. F. (2006). Hormonal and spatial regulation of nitric oxide synthases (NOS) (neuronal NOS, inducible NOS, and endothelial NOS) in the oviducts. *Endocrinology* **147**, 5600-5610.
- Lefèvre, L., Chen, Y., Conner, S. J., Scott, J. L., Publicover, S. J., Ford, W. C. and Barratt, C. L. (2007). Human spermatozoa contain multiple targets for protein S-nitrosylation: an alternative mechanism of the modulation of sperm function by nitric oxide? *Proteomics* **7**, 3066-3084.
- Li, L. and Moore, P. K. (2007). An overview of the biological significance of endogenous gases: new roles for old molecules. *Biochem. Soc. Trans.* **35**, 1138-1141.
- McStay, G. P., Clarke, S. J. and Halestrap, A. P. (2002). Role of critical thiol groups on the matrix surface of the adenine nucleotide translocase in the mechanism of the mitochondrial permeability transition pore. *Biochem. J.* **367**, 541-548.
- Meissner, G. (2004). Molecular regulation of cardiac ryanodine receptor ion channel. *Cell Calcium* **35**, 621-628.
- Miki, N., Kawabe, Y. and Kuriyama, K. (1977). Activation of cerebral guanylate cyclase by nitric oxide. *Biochem. Biophys. Res. Commun.* **75**, 851-856.
- Mingoti, G. Z., Garcia, J. M. and Rosa-e-Silva, A. A. (2002). Steroidogenesis in cumulus cells of bovine cumulus-oocyte-complexes matured *in vitro* with BSA and different concentrations of steroids. *Anim. Reprod. Sci.* **69**, 175-186.
- Miraglia, E., Rullo, M. L., Bosia, A., Massobrio, M., Revelli, A. and Ghigo, D. (2007). Stimulation of the nitric oxide/cyclic guanosine monophosphate signaling pathway elicits human sperm chemotaxis *in vitro*. *Fertil. Steril.* **87**, 1059-1063.
- O'Flaherty, C., Rodriguez, P. and Srivastava, S. (2004). L-arginine promotes capacitation and acrosome reaction in cryopreserved bovine spermatozoa. *Biochim. Biophys. Acta* **1674**, 215-221.

- O'Flaherty, C., de Lamirande, E. and Gagnon, C. (2005). Reactive oxygen species and protein kinases modulate the level of phospho-MEK-like proteins during human sperm capacitation. *Biol. Reprod.* **73**, 94-105.
- O'Flaherty, C., de Lamirande, E. and Gagnon, C. (2006). Positive role of reactive oxygen species in mammalian sperm capacitation: triggering and modulation of phosphorylation events. *Free Radic. Biol. Med.* **41**, 528-540.
- Pariente, J. A., Camello, C., Camello, P. J. and Salido, G. M. (2001). Release of calcium from mitochondrial and nonmitochondrial intracellular stores in mouse pancreatic acinar cells by hydrogen peroxide. *J. Membr. Biol.* **179**, 27-35.
- Publicover, S., Harper, C. V. and Barratt, C. (2007).  $[Ca^{2+}]_i$  signalling in sperm: making the most of what you've got. *Nat. Cell Biol.* **9**, 235-242.
- Rastaldo, R., Pagliaro, P., Cappello, S., Penna, C., Mancardi, D., Westerhof, N. and Losano, G. (2007). Nitric oxide and cardiac function. *Life Sci.* **81**, 779-793.
- Revelli, A., Costamagna, C., Moffa, F., Aldieri, E., Ochetti, S., Bosia, A., Massobrio, M., Lindblom, B. and Ghigo, D. (2001). Signaling pathway of nitric oxide-induced acrosome reaction in human spermatozoa. *Biol. Reprod.* **64**, 1708-1712.
- Reyes, R., Vásquez, M. L. and Delgado, N. M. (2004). Detection and bioimaging of nitric oxide in bovine oocytes and sperm cells. *Arch. Androl.* **50**, 303-309.
- Rosselli, M., Dubey, R. K., Rosselli, M. A., Macas, E., Fink, D., Lauper, U., Keller, P. J. and Imthurn, B. (1996). Identification of nitric oxide synthase in human and bovine oviduct. *Mol. Hum. Reprod.* **2**, 607-612.
- Rosselli, M., Keller, P. J. and Dubey, R. K. (1998). Role of nitric oxide in the biology, physiology and pathophysiology of reproduction. *Hum. Reprod. Update* **4**, 3-24.
- Roy, S. C. and Atreja, S. K. (2008). Tyrosine phosphorylation of a 38-kDa capacitation-associated buffalo (*Bubalus bubalis*) sperm protein is induced by L-arginine and regulated through a cAMP/PKA-independent pathway. *Int. J. Androl.* **31**, 12-24.
- Schrammel, A., Behrends, S., Schmidt, K., Koesling, D. and Mayer, B. (1996). Characterization of 1H-[1,2,4]oxadiazolo[4,3-a]quinoxalin-1-one as a heme-site inhibitor of nitric oxide-sensitive guanylyl cyclase. *Mol. Pharmacol.* **50**, 1-5.
- Singh, S. P., Wishnok, J. S., Keshive, M., Deen, W. M. and Tannenbaum, S. R. (1996). The chemistry of the S-nitrosoglutathione/glutathione system. *Proc. Natl. Acad. Sci. USA* **93**, 14428-14433.
- Stoyanovsky, D., Murphy, T., Anno, P. R., Kim, Y. M. and Salama, G. (1997). Nitric oxide activates skeletal and cardiac ryanodine receptors. *Cell Calcium* **21**, 19-29.
- Tao, Y., Fu, Z., Zhang, M., Xia, G., Yang, J. and Xie, H. (2004). Immunohistochemical localization of inducible and endothelial nitric oxide synthase in porcine ovaries and effects of NO on antrum formation and oocyte meiotic maturation. *Mol. Cell Endocrinol.* **222**, 93-103.
- Thaler, C. D. and Epel, D. (2003). Nitric oxide in oocyte maturation, ovulation, fertilization, cleavage and implantation: a little dab'll do ya. *Curr. Pharm. Des.* **9**, 399-409.
- Thundathil, J., de Lamirande, E. and Gagnon, C. (2003). Nitric oxide regulates the phosphorylation of the threonine-glutamine-tyrosine motif in proteins of human spermatozoa during capacitation. *Biol. Reprod.* **68**, 1291-1298.
- Uhler, M. L., Leung, A., Chan, S. Y. and Wang, C. (1992). Direct effects of progesterone and antiprogesterone on human sperm hyperactivated motility and acrosome reaction. *Fertil. Steril.* **58**, 1191-1198.
- Weinberg, J. B., Doty, E., Bonaventura, J. and Haney, A. F. (1995). Nitric oxide inhibition of human sperm motility. *Fertil. Steril.* **64**, 408-413.
- Wennemuth, G., Babcock, D. F. and Hille, B. (2003). Calcium clearance mechanisms of mouse sperm. *J. Gen. Physiol.* **122**, 115-128.
- Wu, T. P., Huang, B. M., Tsai, H. C., Lui, M. C. and Liu, M. Y. (2004). Effects of nitric oxide on human spermatozoa activity, fertilization and mouse embryonic development. *Arch. Androl.* **50**, 173-179.
- Yamashita, Y., Shimada, M., Okazaki, T., Maeda, T. and Terada, T. (2003). Production of progesterone from de novo-synthesized cholesterol in cumulus cells and its physiological role during meiotic resumption of porcine oocytes. *Biol. Reprod.* **68**, 1193-1198.
- Yang, J., Serres, C., Philibert, D., Robel, P., Baulieu, E. E. and Jouannet, P. (1994). Progesterone and RU486: opposing effects on human sperm. *Proc. Natl. Acad. Sci. USA* **91**, 529-533.
- Yang, M. G., Yang, Y., Huang, P., Zheng, S. L., Fan, A. L., Cheng, X. D., Zhou, T. C., Li, J., Zhang, Z. Y. and Hao, X. K. (2005). Sodium nitroprusside facilitates human sperm capacitation and acrosome reaction *Zhonghua Nan Ke Xue* **11**, 422-425.
- Yang, Y. and Loscalzo, J. (2005). S-nitrosoprotein formation and localization in endothelial cells. *Proc. Natl. Acad. Sci. USA* **102**, 117-122.
- Zaman, K., Carraro, S., Doherty, J., Henderson, E. M., Lendermon, E., Liu, L., Vergheze, G., Zigler, M., Ross, M., Park, E. et al. (2006). S-nitrosylating agents: a novel class of compounds that increase cystic fibrosis transmembrane conductance regulator expression and maturation in epithelial cells. *Mol. Pharmacol.* **70**, 1435-1442.
- Zhang, H. and Zheng, R. L. (1996). Possible role of nitric oxide on fertile and asthenozoospermic infertile human sperm functions. *Free Radic. Res.* **25**, 347-354.
- Zhang, H., Vollmer, M., De Geyter, M., Litzistorf, Y., Ladewig, A., Durrenberger, M., Guggenheim, R., Miny, P., Holzgreve, W. and De Geyter, C. (2000). Characterization of an immortalized human granulosa cell line (COV434). *Mol. Hum. Reprod.* **6**, 146-153.
- Zhang, Y. and Hogg, N. (2004). The mechanism of transmembrane S-nitrosothiol transport. *Proc. Natl. Acad. Sci. USA* **101**, 7891-7896.
